# Supplementary material for: A Simple RP-HPLC Method to Simultaneously Assay the Contents of Lamivudine, Tenofovir, and Nevirapine in Fixed Dose Combined Oral Antiviral Medicines
Source: Hindawi journal article supplement (doi:10.1155/2020/4618360), 2020-09-08
Supplement: f1 [file 4618360.f1.docx]

# SUPPLEMENTARY DATA

**S1:** Investigations carried out to determine suitable chromatographic conditions in method development

| **Trial** | **Mobile phase composition** | **Type of elution** | **Flow rate (ml/min)** | **Buffer pH** | **Comment** |
| --- | --- | --- | --- | --- | --- |
| **1a.** | Methanol : Phosphate Buffer (80:20) | Isocratic | 1.0 | 3 | Good peaks, tailing. |
| **1b.** | Methanol : Phosphate Buffer  (75:25 / 70:30 / 65:35 / 55:45) | Gradient | 1.0 | 3 | Tailing, peak splitting of lamivudine and minimal resolution between peaks, decreasing retention time, clogging of column over time. |
| **2** | Methanol : Ammonium Acetate Buffer  (90:10 / 80:20 / 70:30 /  65:35/ 60:40 / 55:45) | Gradient | 1.0 | 3 | Decreasing retention time with decreasing methanol, unsatisfactory resolution, broad peaks |
| **3** | Methanol : Ammonium Acetate Buffer: Acetonitrile (30:60:10 / 30:50:20) | Gradient | 1.0 | 2.60 | Broad peaks, tailing, unsatisfactory resolution, increasing run time |
| **4** | Methanol : Ammonium Acetate Buffer: Acetonitrile (50:40:10) | Isocratic | 1.2 | 3.3 | Decreased retention time, inadequate resolution, relatively symmetrical peaks |
| **5** | Methanol : Ammonium Acetate Buffer: Acetonitrile (50: 40: 10) | Isocratic | 1.0 | 2.8 | Symmetrical peaks, good resolution between analytes, convenient run time. |

**S2**: Specificity/selectivity

| **Analyte** | **Sample solution** | **Excipient(s)/Mobile phase/other compounds** | **3TC** | **NVP** | **TDF** |
| --- | --- | --- | --- | --- | --- |
| **General** | ***Sample M*** – Mobile phase only | - | - | - |  |
| ***Blank sample*** – Mobile phase + excipients | - | - | - |  |
| ***Sample G–*** blank sample + 3TC (45 µg/ml) + NVP (21 µg/ml) + TDF (30 µg/ml) | - | 3.260 | 5.425 | 7.553 |
| **Lamivudine** | ***Sample L1*** – Mobile phase + 3TC (45 µg/ml) only | - | 3.263 | - | - |
| ***Sample L2*** – Blank sample + 3TC (45 µg/ml) only | - | 3.273 | - | - |
| ***Sample L3 –*** Blank sample + NVP (21 µg/ml) + TDF (30 µg/ml) | - | - | 5.422 | 7.555 |
| **Nevirapine** | ***Sample N1*** – Mobile phase + NVP (21 µg/ml) only | - | - | 5.425 | - |
| ***Sample N2*** – Blank sample + NVP (21 µg/ml) only | - | - | 5.422 | - |
| ***Sample N3*** – Blank sample + 3TC (45 µg/ml) + TDF (30 µg/ml) | - | 3.278 | - | 7.558 |
| **Tenofovir disoproxil fumarate** | ***Sample T1*** – Mobile phase + TDF (30 µg/ml) only | - | - | - | 7.556 |
| ***Sample T2*** – Blank sample + TDF (30 µg/ml) only | - | - | - | 7.552 |
| ***Sample T3*** – Blank sample + 3TC (45 µg/ml) + NVP (21 µg/ml) | - | 3.271 | 5.423 | - |
| ***Mean ± SD for Rt (N = 5)*** | | - | 3.269 ± 0.0074 | 5.423 ± 0.0015 | 7.555 ± 0.0024 |
| ***Confidence Intervals (@ 95% confidence level) for Retention times*** | |  | 3.260 – 3.278 | 5.422 – 5.425 | 7.552 – 7.558 |
| ***One - Way ANOVA test of retention times*** | |  | Retention times are significantly different from each other (F2,12= 1.102e+006; *p* < 0.0001) | | |

**S3 -** Results for Accuracy Studies involving analytes

| **Sample** | **Concentration (µg/ml)** | **Mean % Recovery** | **RSD%** |
| --- | --- | --- | --- |
| Lamivudine | 36.0 | 99.30 ± 0.34 | 0.3378 |
| 45.0 | 100.80 ± 0.32 | 0.3203 |
| 54.0 | 97.90 ± 0.46* | 0.4699 |
| Nevirapine | 16.8 | 102.99 ± 0.45* | 0.4368 |
| 21.0 | 99.71 ± 0.72 | 0.7210 |
| 25.2 | 98.22 ± 0.51 | 0.5205 |
| Tenofovir disoproxil fumarate | 24.0 | 101.75 ± 0.28 | 0.2700 |
| 30.0 | 98.58 ± 0.71 | 0.7182 |
| 36.0 | 98.18 ± 0.26 | 0.1805 |
| **Acceptance criteria** | | 98 – 102% |  |

*minimal deviations of results from acceptance criteria

**S4** – Precision

Repeatability - triplicate injections of three different concentrations of the analytes, to investigate the effect of concentration change on the precision of the method.

| **Test No** | **Lamivudine** | | | **Nevirapine** | | | **Tenofovir disoproxil fumarate** | | |
| --- | --- | --- | --- | --- | --- | --- | --- | --- | --- |
| **Conc** | **Peak Area** | **RSD for peak area** | **Conc** | **Peak Area** | **RSD for peak area** | **Conc** | **Peak Area** | **RSD for peak area** |
| 1 | 15 µg/ml | 258001 | 0.20% | 7 µg/ml | 68710 | 0.93% | 10 µg/ml | 55837 | 0.29% |
| 2 | 257409 | 67531 | 55867 |
| 3 | 256998 | 67713 | 55575 |
| 1 | 45 µg/ml | 697982 | 0.65% | 21 µg/ml | 205708 | 1.05% | 30 µg/ml | 163009 | 0.92% |
| 2 | 697424 | 205812 | 165991 |
| 3 | 689915 | 202046 | 164019 |
| 1 | 90 µg/ml | 1367601 | 0.35% | 42 µg/ml | 403699 | 0.41% | 59 µg/ml | 319728 | 1.63% |
| 2 | 1368511 | 405291 | 320212 |
| 3 | 1359821 | 407038 | 311006 |
|  | ***Mean RSD*** | | **0.4000% ± 0.2291** | ***Mean RSD*** | | **0.7967% ± 0.342** | ***Mean RSD*** | | **0.9467% ± 0.6704** |

Intermediate precision - triplicate injections of three different concentrations of the analytes in three consecutive days, to investigate the extent of variations in peak areas as a result of environmental conditions.

| **Day** | **Sr. No** | **3TC** | | | **NVP** | | | **TDF** | | |
| --- | --- | --- | --- | --- | --- | --- | --- | --- | --- | --- |
| **15 µg/ml** | **45 µg/ml** | **90 µg/ml** | **7 µg/ml** | **21 µg/ml** | **42 µg/ml** | **10 µg/ml** | **30 µg/ml** | **59 µg/ml** |
| **Day 1** | 1 | 257301 | 698382 | 1347496 | 68710 | 205708 | 403699 | 55837 | 163009 | 319728 |
| 2 | 259971 | 687492 | 1357501 | 67531 | 205812 | 405291 | 55867 | 165991 | 320212 |
| 3 | 258518 | 707986 | 1378103 | 67713 | 199682 | 407038 | 55575 | 164019 | 311006 |
| Mean ± SD | 258597 ± 1337 | 697953 ± 10254 | 1.361e+006 ± 15606 | 67985 ± 634.7 | 203734 ± 3510 | 405343 ± 1670 | 55760 ± 160.6 | 164340 ± 1517 | 316982 ± 5181 |
| RSD | 0.52% | 1.47% | 1.15% | 0.93% | 1.72% | 0.41% | 0.29% | 0.92% | 1.63% |
| **Day 2** | 1 | 227008 | 679194 | 1338424 | 65713 | 202046 | 404126 | 56575 | 164551 | 319302 |
| 2 | 224263 | 698482 | 1348827 | 64713 | 205708 | 408048 | 56395 | 163197 | 318827 |
| 3 | 225940 | 677559 | 1320125 | 64738 | 210012 | 406211 | 55980 | 164998 | 317125 |
| Mean ± SD | 225737 ± 1384 | 685078 ± 11637 | 1.336e+006 ± 14531 | 65055 ± 570.3 | 205922 ± 3987 | 406128 ± 1962 | 56317 ± 305.1 | 164249 ± 937.8 | 318418 ± 1145 |
| RSD | 0.61% | 1.70% | 1.09% | 0.88% | 1.94% | 0.48% | 0.54% | 0.57% | 0.36% |
| **Day 3** | 1 | 215492 | 676559 | 1335243 | 67170 | 209682 | 408048 | 55680 | 162009 | 318715 |
| 2 | 216221 | 684711 | 1330387 | 66739 | 215708 | 408387 | 55101 | 164248 | 320108 |
| 3 | 220263 | 698482 | 1348827 | 66090 | 208982 | 404887 | 55708 | 163354 | 311892 |
| Mean ± SD | 217325 ± 2570 | 686584± 11081 | 1.338e+006 ± 9558 | 66666 ± 543.7 | 211457± 3698 | 407107± 1930 | 55496 ± 342.7 | 163204 ± 1127 | 316905 ± 4397 |
| RSD | 1.18% | 1.61% | 0.71% | 0.82% | 1.75% | 0.47% | 0.62% | 0.69% | 1.39% |

**S5** – Robustness

Examining effects from change in flow rate

| **Parameter** | **Quality attribute monitored** | **Working parameter** | **Change** | **Analyte** | **Mean ± SD (min)** | **ANOVA** | **Remarks from ANOVA** |
| --- | --- | --- | --- | --- | --- | --- | --- |
| Flow rate (ml/min) | Retention time | 1 ml/min | 0.9 ml/min | 3TC | 3.416 ± 0.019 | F(2, 6) = 60322;  p < 0.0001. | Retention times were significantly different from each other. No overlapping of peaks |
| NVP | 8.375 ± 0.033 |
| TDF | 9.573 ± 0.011 |
| 1.1 ml/min | 3TC | 3.131 ± 0.131 | F(2, 6) = 1949; p < 0.0001 | Retention times were significantly different from each other. No overlapping of peaks. |
| NVP | 3.417 ± 0.022 |
| TDF | 6.783 ± 0.036 |

Examining effects from change in wavelength of detection

| **Parameter** | **Quality attribute monitored** | **Working parameter** | **Change** | **Analyte** | **Peak area** | **RSD (%)** | **Deviations** | **Remarks** |
| --- | --- | --- | --- | --- | --- | --- | --- | --- |
| Wavelength of detection | Peak area | 270 nm | 268 nm | 3TC | 706702 ± 205.1 | 0.1976 | 1.460 | Peak areas remained precise upon change of wavelength. Also, the % deviations were within appreciable limits |
| NVP | 204186 ± 1398 | 0.6848 | - 1.587 |
| TDF | 163237 ± 239.2 | 0.1465 | - 0.037 |
| 272 nm | 3TC | 690664 ± 158.4 | 0.1365 | -0.842 |
| NVP | 199845 ± 584.2 | 0.2923 | -3.679 |
| TDF | 163220 ± 236.4 | 0.1448 | -0.048 |
|  |  |  |  | **Acceptance Criteria** | | **RSD < 2%** | **± 5.0%.** |
